# Supplementary material for: Comprehensive Evaluation of Lipid Nanoparticles and Polyplex Nanomicelles for Muscle-Targeted mRNA Delivery
Source: MDPI journal article supplement (doi:10.3390/pharmaceutics15092291), 2023-09-07
Supplement: s1 [file s1]

## **Supplementary Materials**

### **Comprehensive Evaluation of Lipid Nanoparticles and Polyplex Nanomicelles for Muscle-targeted mRNA Delivery**

Xuan Du<sup>1</sup>, Erica Yada<sup>1,2</sup>, Yuki Terai<sup>1</sup>, Takuya Takahashi<sup>1</sup>, Hideyuki Nakanishi<sup>1</sup>, Hiroki Tanaka<sup>3</sup>, Hidetaka Akita<sup>3</sup> and Keiji Itaka<sup>1,4,\*</sup>

<sup>1</sup>Department of Biofunction Research, Institute of Biomaterials and Bioengineering, Tokyo Medical and Dental University (TMDU), Tokyo 101-0062, Japan;

<sup>2</sup>NANO MRNA, Co., Ltd. Tokyo 104-0031, Japan;

<sup>3</sup>Graduate School of Pharmaceutical Sciences, Tohoku University, Sendai 980-8578, Japan;

<sup>4</sup>Clinical Biotechnology Team, Center for Infectious Disease Education and Research (CiDER), Osaka University, Osaka 565-0871, Japan

**Table S1.** The particle size, polydispersity (PDI), and zeta-potential of LNP and nanomicelle used in this study.

|             | Particle size (nm) | PDI                | $\zeta$ -potential (mV) |
|-------------|--------------------|--------------------|-------------------------|
| LNP         | 84.87              | 0.160              | -3.47                   |
| nanomicelle | 52.83 <sup>*</sup> | 0.162 <sup>*</sup> | 0.071 <sup>*</sup>      |

<sup>\*</sup> citation [12] in the main text

**Figure S1**

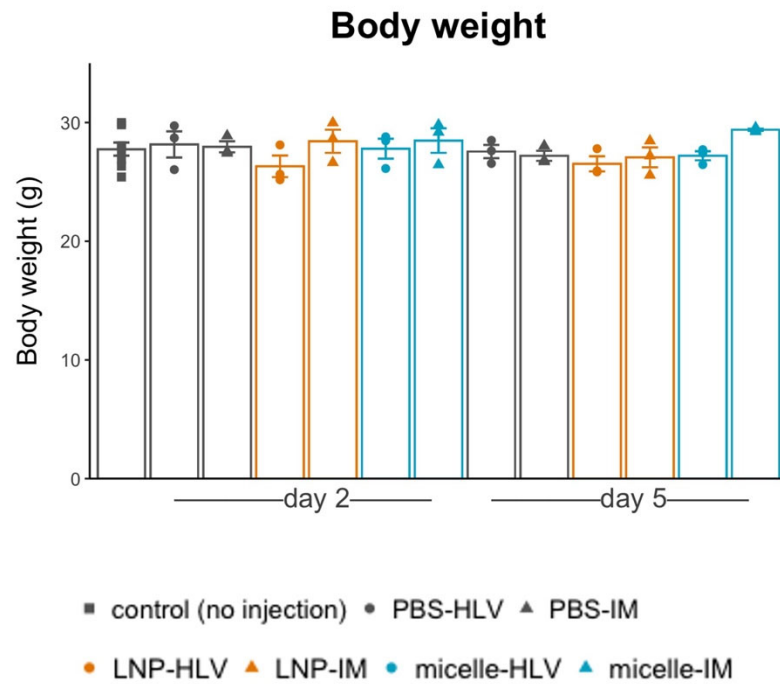

**Figure S1.** Body weight of the mice 2 and 5 days after administration ( $n = 3$  and  $n = 6$  for the control group). Data are presented as mean  $\pm$  SEM.
